# Supplementary material
Source: PubMed Central journal article supplement (PMC2903788)
Supplement: supp_P002899_jlr.P002899-2.pdf [file supp_P002899_jlr.P002899-2.pdf]

**Supplementary table 2: Baseline characteristics of the study population by cholestanol to cholesterol tertiles**

|                                            | Cholestanol to cholesterol tertiles |                  |                  | P*       |
|--------------------------------------------|-------------------------------------|------------------|------------------|----------|
|                                            | 1st tertile                         | 2nd tertile      | 3rd tertile      |          |
| Number                                     | 419                                 | 419              | 419              |          |
| <b>Lathosterol : cholesterol, mmol/mol</b> | 1.90 (1.41-2.52)                    | 1.56 (1.13-2.19) | 1.16 (0.84-1.60) | < 0.001¶ |
| <b>Cholestanol : cholesterol, mmol/mol</b> | 1.01 (0.86-1.10)                    | 1.37 (1.28-1.44) | 1.82 (1.65-2.12) |          |
| <b>Campesterol : cholesterol, mmol/mol</b> | 0.97 (0.70-1.29)                    | 1.20 (0.91-1.58) | 1.73 (1.24-2.32) | < 0.001¶ |
| <b>Sitosterol : cholesterol, mmol/mol</b>  | 0.51 (0.39-0.67)                    | 0.63 (0.47-0.81) | 0.85 (0.65-1.19) | < 0.001¶ |
| <b>Cholestanol : lathosterol</b>           | 0.52 (0.36-0.71)                    | 0.88 (0.59-1.22) | 1.59 (1.10-2.48) | < 0.001¶ |
| <b>Campesterol : lathosterol</b>           | 0.50 (0.31-0.73)                    | 0.74 (0.47-1.22) | 1.41 (0.91-2.49) | < 0.001¶ |
| <b>Sitosterol : lathosterol</b>            | 0.26 (0.17-0.41)                    | 0.38 (0.25-0.62) | 0.73 (0.46-1.25) | < 0.001¶ |
| <b>Age, years</b>                          | 63.0 ± 10.6                         | 62.7 ± 10.8      | 62.7 ± 11.5      | < 0.907† |
| <b>Male gender</b>                         | 273 (65.2)                          | 269 (64.2)       | 289 (69.0)       | 0.255‡   |
| <b>Body mass index, kg/m<sup>2</sup></b>   | 28.3 (4.2)                          | 27.1 (4.0)       | 26.5 (4.1)       | < 0.001  |
| <b>Waist circumference, cm</b>             | 101 ± 12                            | 98 ± 12          | 96 ± 13          | < 0.001  |
| <b>Type 2 diabetes</b>                     |                                     |                  |                  |          |
| No                                         | 273 (65.2)                          | 309 (73.7)       | 305 (72.8)       |          |
| Yes, no insulin treatment                  | 131 (31.3)                          | 87 (20.8)        | 90 (21.5)        | 0.001    |
| Yes, insulin treatment                     | 15 (3.6)                            | 23 (5.5)         | 24 (5.7)         | 0.310    |
| <b>HbA1c, %</b>                            | 6.5 ± 1.5                           | 6.2 ± 1.2        | 6.1 ± 1.1        | < 0.001  |
| <b>Fasting glucose, mg/dl</b>              | 117 ± 40                            | 111 ± 32         | 109 ± 34         | 0.002    |
| <b>Fasting insulin, U/l</b>                | 10.0 (7.0-15.0)                     | 8.0 (6.0-13.0)   | 7.0 (5.0-11.0)   | < 0.001¶ |
| <b>Systemic hypertension</b>               | 306 (73.0)                          | 310 (74.0)       | 288 (68.7)       | 0.166    |
| <b>Systolic blood pressure, mmHg</b>       | 141 ± 24                            | 143 ± 23         | 144 ± 23         | 0.027§   |
| <b>Diastolic blood pressure, mmHg</b>      | 81 ± 11                             | 82 ± 11          | 82 ± 11          | 0.031§   |
| <b>Total cholesterol, mg/dl</b>            | 199 ± 35                            | 203 ± 35         | 201 ± 38         | 0.411    |
| <b>LDL cholesterol, mg/dl</b>              | 120 ± 31                            | 124 ± 30         | 125 ± 36         | 0.087    |
| <b>HDL cholesterol, mg/dl</b>              | 40 ± 11                             | 41 ± 11          | 40 ± 12          | 0.815    |
| <b>Triglycerides, mg/dl</b>                | 155 (113-210)                       | 146 (112-205)    | 125 (95-167)     | < 0.001¶ |
| <b>Smoking</b>                             |                                     |                  |                  |          |
| Never                                      | 176 (42.0)                          | 175 (41.8)       | 162 (38.7)       |          |
| Past                                       | 177 (42.2)                          | 179 (42.7)       | 165 (39.4)       | 0.644    |
| Current                                    | 66 (15.8)                           | 65 (15.5)        | 92 (22.0)        | 0.051    |
| <b>C-reactive protein, mg/l</b>            | 3.01 (1.24-7.36)                    | 3.23 (1.26-7.83) | 3.59 (1.26-9.24) | 0.128¶   |
| <b>APOE genotype (419/417/419)</b>         |                                     |                  |                  |          |
| E3/3                                       | 266 (63.6)                          | 267 (63.9)       | 262 (62.5)       |          |
| E2/2, E2/3, E2/4                           | 68 (16.3)                           | 71 (17.0)        | 72 (17.2)        | 0.671    |
| E3/4, E4/4                                 | 84 (20.1)                           | 80 (19.1)        | 85 (20.3)        | 0.879    |

Values are means ± standard deviations or medians with inter-quartile ranges in the cases of continuous variables; Values represent numbers (percentages) of subjects in the cases of categorical variables; \* General linear model or logistic regression, adjusted for age and gender; † General linear model, adjusted for gender only; ‡ Logistic regression, adjusted for age only; § Additionally adjusted for the use of antihypertensive drugs; ¶ General linear model of logarithmically transformed values.
